# Supplementary material for: Facile low-temperature growth of carbon nanosheets toward simultaneous determination of dopamine, ascorbic acid and uric acid
Source: Royal Society of Chemistry journal article supplement (doi:10.1039/c1an15630f), 2011-01-01
Supplement: c1an15630f.pdf [file c1an15630f.pdf]

Table S1 Comparison of present work for the simultaneous determination of AA, DA and UA with previous literature reports

| No. | Electrode                                                                       | Technique        | pH  | Scan rate (V/s) | Oxidation peak potentials (mV) |       |       | Detection limit of DA ( $\mu\text{M}$ ) | Reference                                                               |
|-----|---------------------------------------------------------------------------------|------------------|-----|-----------------|--------------------------------|-------|-------|-----------------------------------------|-------------------------------------------------------------------------|
|     |                                                                                 |                  |     |                 | AA                             | DA    | UA    |                                         |                                                                         |
| 1   | Oracet blue modified GCE <sup>a</sup>                                           | DPV <sup>b</sup> | 8.0 | -               | -35                            | 130   | 225   | 0.02                                    | Zare et al., J. Electroanal. Chem., 2006, <b>589</b> , 60-69.           |
| 2   | Poly (vinyl alcohol) covalently modified GCE                                    | CV <sup>c</sup>  | 7.0 | 0.05            | 70                             | 210   | 350   | 1.4                                     | Li et al., Sensor. Actuat. B, 2006, <b>115</b> , 134-139.               |
|     |                                                                                 | DPV              | 7.0 | 0.05            | -10                            | 170   | 300   |                                         |                                                                         |
| 3   | Poly (evans blue) film modified GCE                                             | CV               | 4.5 | 0.10            | 191                            | 373   | 553   | 0.25                                    | Lin et al., Bioelectrochemistry, 2008, <b>73</b> , 11-17.               |
|     |                                                                                 | DPV              | 4.5 | 0.10            | 180                            | 204   | 362   |                                         |                                                                         |
| 4   | Palladium nanoparticle-loaded carbon nanofibers modified carbon paste electrode | CV               | 7.0 | 0.05            | 150                            | 231   | 262   | 0.2                                     | Huang et al., Biosens. Bioelectron., 2008, <b>24</b> , 632-637.         |
|     |                                                                                 | DPV              | 4.5 | 0.02            | 158                            | 402   | 550   |                                         |                                                                         |
| 5   | Oxidized-GCE                                                                    | CV               | 7.0 | -               | 64                             | 227   | 354   | -                                       | Thiagarajan et al., Biosens. Bioelectron., 2009, <b>24</b> , 2712-2715. |
| 6   | Single-walled carbon nanohorn modified GCE                                      | LSV <sup>d</sup> | 7.0 | 0.1             | 13                             | 224   | 376   | 0.06                                    | Zhu et al., Biosens. Bioelectron., 2009, <b>25</b> , 940-943.           |
| 7   | Polymerized luminol film modified GCE                                           | DPV              | 7.0 | 0.1             | -                              | 167   | 295   | -                                       | Kumar et al., Electroanal., 2009, <b>21</b> , 2281 - 2286.              |
| 8   | Ordered mesoporous carbon/Nafion composite film modified GCE                    | CV               | 7.4 | 0.1             | 0                              | 190   | 340   | 0.5                                     | Zheng et al., J. Electroanal. Chem., 2009, <b>625</b> , 82-87.          |
| 9   | Poly(acid chrome blue K) modified GCE                                           | CV               | 4.0 | -               | 115                            | 315   | 483   | 0.5                                     | R. Zhang et al., Sensors. Actuat., B, 2009, <b>138</b> , 174-181.       |
|     |                                                                                 | DPV              | 4.0 | -               | 95                             | 288   | 454   |                                         |                                                                         |
| 10  | Multilayered carbon nanotube modified carbon-ceramic electrode                  | DPV              | 4.5 | 0.02            | 92                             | 297   | 458   | 0.31                                    | Habibi et al., Electrochim. Acta, 2010, <b>55</b> , 5492-5498.          |
| 11  | Poly(sulfonazo III) modified GCE                                                | CV               | 3.0 | 0.10            | 170                            | 350   | 500   | 0.03                                    | Ensafi et al., Sensor. Actuat. B, 2010, <b>147</b> , 213-221.           |
| 12  | Graphene/size-selected Pt nanocomposites modified GCE                           | CV               | 7.0 | 0.05            | 40                             | 225   | 369   | 0.03                                    | Sun et al., Biosens. Bioelectron., 2011, <b>26</b> 3450-3455.           |
|     |                                                                                 | DPV              | 7.0 | -               | -50                            | 190   | 310   |                                         |                                                                         |
| 13  | Functionalized-graphene modified graphite electrode                             | CV               | 7.0 | 0.05            | -29                            | 170   | 334   | 0.25                                    | M. Mallesha et al., Bioelectrochemistry, 2011, <b>81</b> , 104-108.     |
|     |                                                                                 | DPV              | 7.0 | 0.02            | -105                           | 99    | 235   |                                         |                                                                         |
| 14  | Graphene oxide-templated polyaniline microsheets modified GCE                   | DPV              | 7.4 | -               | -55                            | 195   | 385   | 0.5                                     | Bao et al., Electroanal., 2011, <b>23</b> , 878 - 884.                  |
| 15  | Graphene-doped film of layered double hydroxides modified GCE                   | CV               | 7.0 | 0.1             | -23                            | 169   | 297   | 0.3                                     | Wang et al., Microchim Acta, 2011, <b>174</b> , 41-46.                  |
| 16  | SiC modified GCE                                                                | CV               | 7.0 | 0.1             | ~30                            | ~200  | ~337  | 0.05                                    | Wu et al., Chem. Commun., 2011, <b>47</b> , 6458-6460.                  |
| 17  | Graphene nanoflake films on Si                                                  | CV               | 7.0 | 0.1             | 6.4                            | 187.6 | 323.6 | 0.17                                    | Shang et al., Adv. Funct. Mater., 2008, <b>18</b> , 3506-3514.          |
| 18  | Carbon nanosheets modified Pt electrode                                         | CV               | 7.0 | 0.1             | -1                             | 214   | 355   | 0.12                                    | Present work                                                            |

<sup>a</sup> Glassy carbon electrode<sup>b</sup> Differential pulse voltammetry<sup>c</sup> Cyclic voltammetry<sup>d</sup> Linear sweep voltammetry
